# Supplementary material
Source: HighWire-hosted journal article supplement (https://injuryprevention.bmj.com/highwire/filestream/160176/field_highwire_adjunct_files/0/ip-2023-044958supp001_data_supplement.pdf)
Supplement: ip-2023-044958supp001_data_supplement.pdf [file ip-2023-044958supp001_data_supplement.pdf]

**Table 1: Injury Characteristics among Building Construction Workers**

| <b>Variables</b>                   | <b>n</b> | <b>%</b> |
|------------------------------------|----------|----------|
| <b>Occupational injury</b>         |          |          |
| Yes                                | 282      | (56.4)   |
| No                                 | 218      | (43.6)   |
| <b>Frequency of Injury (n=282)</b> |          |          |
| Once                               | 87       | (17.3)   |
| More than once                     | 195      | (38.7)   |
| <b>Nature of Injury*</b>           |          |          |
| Abrasion/Laceration                | 142      | (28.2)   |
| Eye Injury                         | 38       | (7.5)    |
| Punctured                          | 115      | (22.8)   |
| Dislocation/Fractured              | 39       | (7.8)    |
| Cut                                | 134      | (26.6)   |
| Backache/Sprain                    | 120      | (23.8)   |
| Electric shock                     | 26       | (5.2)    |
| Amputation                         | 2        | (0.4)    |
| <b>Place of Injury*</b>            |          |          |
| Ground floor                       | 157      | (31.2)   |
| Walls                              | 110      | (21.8)   |
| Rooftops                           | 74       | (14.7)   |
| Height from the ground             | 91       | (18.1)   |
| <b>Injury time*</b>                |          |          |
| Morning                            | 47       | (9.3)    |

**Table 1: Injury Characteristics among Building Construction Workers**

| <b>Variables</b>               | <b>n</b> | <b>%</b> |
|--------------------------------|----------|----------|
| Afternoon                      | 143      | (28.4)   |
| Evening                        | 79       | (15.7)   |
| Night                          | 12       | (2.6)    |
| <b>Day of Injury*</b>          |          |          |
| Monday                         | 59       | (11.7)   |
| Tuesday                        | 71       | (14.1)   |
| Wednesday                      | 81       | (16.1)   |
| Thursday                       | 64       | (12.7)   |
| Friday                         | 15       | (3.0)    |
| Saturday                       | 90       | (17.9)   |
| Sunday                         | 7        | (1.4)    |
| Can't Recall                   | 98       | (19.4)   |
| <b>Mechanism of Injury*</b>    |          |          |
| Fell from Height               | 87       | (17.3)   |
| Cut by a sharp object          | 175      | (34.7)   |
| Hit by a falling object        | 103      | (20.4)   |
| Punctured by material          | 113      | (22.4)   |
| Overexertion during lifting    | 80       | (15.9)   |
| Struck by a Machine            | 20       | (4.0)    |
| contact with the electric line | 28       | (5.6)    |
| Others                         | 7        | (1.4)    |

**Table 1: Injury Characteristics among Building Construction Workers**

| <b>Variables</b>                           | <b>n</b> | <b>%</b> |
|--------------------------------------------|----------|----------|
| <b>Body part injured*</b>                  |          |          |
| Head & Neck                                | 61       | (12.1)   |
| Upper limbs                                | 240      | (47.7)   |
| Lower limbs                                | 312      | (61.9)   |
| Chest & Abdomen                            | 107      | (21.2)   |
| Others                                     | 1        | (0.2)    |
| <b>Sought Medical care (n=282)</b>         |          |          |
| Yes                                        | 173      | (34.3)   |
| No                                         | 109      | (21.6)   |
| <b>Facility (n=173)</b>                    |          |          |
| Public Health facility                     | 117      | (23.2)   |
| Private Health facility                    | 10       | (2.0)    |
| Pharmacy/Drug store                        | 39       | (7.7)    |
| Traditional Healer                         | 7        | (1.4)    |
| <b>Hospitalized (n=173)</b>                |          |          |
| Yes                                        | 34       | (6.7)    |
| No                                         | 139      | (27.6)   |
| <b>Time taken for injury healed (days)</b> |          |          |
| 1                                          | 15       | (3.0)    |
| 2 ~ 4                                      | 107      | (21.2)   |
| 5 ~ 6                                      | 93       | (18.5)   |
| > a Week                                   | 64       | (22.9)   |

Table 1: Injury Characteristics among Building Construction Workers

| Variables                     | n   | %      |
|-------------------------------|-----|--------|
| Time to return to work (days) |     |        |
| < 1                           | 66  | (13.1) |
| 2 ~ 3                         | 46  | (9.1)  |
| 4 ~5                          | 53  | (10.5) |
| > 5                           | 115 | (22.6) |
| *Multiple responses           |     |        |
